# Supplementary material
Source: PubMed Central journal article supplement (PMC7238294)
Supplement: NIHMS1583389-supplement-Supplementary_Data.pdf [file NIHMS1583389-supplement-Supplementary_Data.pdf]

**Supplemental data.**

**Supplemental table 1 – Centile table of total IGF-I.**

| Age, y | Total IGF-I Male<br>(ng/mL) |       |       |       |       |       |       |        | Total IGF-I Female<br>(ng/mL) |       |       |       |       |       |        |  |
|--------|-----------------------------|-------|-------|-------|-------|-------|-------|--------|-------------------------------|-------|-------|-------|-------|-------|--------|--|
|        | Percentile                  |       |       |       |       |       |       |        | Percentile                    |       |       |       |       |       |        |  |
|        | N                           | P5    | P10   | P25   | P50   | P75   | P90   | P95    | P5                            | P10   | P25   | P50   | P75   | P90   | P95    |  |
| 3.5    | 37                          | 72.6  | 84.7  | 109.2 | 144.0 | 188.6 | 239.3 | 275.4  | 84.2                          | 97.9  | 125.6 | 165.3 | 217.1 | 277.0 | 320.2  |  |
| 4.5    | 56                          | 78.9  | 91.5  | 116.8 | 152.7 | 199.2 | 252.4 | 290.4  | 100.1                         | 115.0 | 145.3 | 188.8 | 246.0 | 312.9 | 361.6  |  |
| 5.5    | 48                          | 89.0  | 102.4 | 129.4 | 168.0 | 217.9 | 275.3 | 316.7  | 117.3                         | 133.7 | 166.9 | 215.0 | 278.7 | 354.3 | 410.2  |  |
| 6.5    | 42                          | 101.9 | 116.8 | 146.7 | 189.2 | 244.0 | 306.8 | 352.0  | 135.9                         | 154.2 | 191.3 | 245.0 | 316.6 | 402.2 | 465.9  |  |
| 7.5    | 58                          | 116.0 | 132.9 | 166.8 | 214.3 | 275.2 | 344.5 | 393.9  | 155.7                         | 176.6 | 219.2 | 281.0 | 363.6 | 462.5 | 536.4  |  |
| 8.5    | 59                          | 131.2 | 150.5 | 189.1 | 243.1 | 311.8 | 389.4 | 444.4  | 177.7                         | 202.3 | 252.7 | 326.2 | 425.0 | 543.9 | 632.9  |  |
| 9.5    | 64                          | 148.8 | 171.2 | 215.8 | 278.2 | 357.1 | 445.8 | 508.3  | 204.4                         | 233.8 | 294.3 | 383.3 | 503.8 | 649.9 | 760.1  |  |
| 10.5   | 66                          | 173.1 | 199.3 | 251.6 | 324.6 | 417.1 | 521.0 | 594.3  | 236.0                         | 271.2 | 343.8 | 450.6 | 595.5 | 770.8 | 902.7  |  |
| 11.5   | 63                          | 209.8 | 240.3 | 301.3 | 387.2 | 497.3 | 622.4 | 711.7  | 268.5                         | 310.5 | 396.2 | 519.9 | 683.1 | 874.1 | 1013.6 |  |
| 12.5   | 74                          | 258.0 | 293.2 | 363.7 | 463.2 | 591.8 | 739.5 | 845.9  | 299.3                         | 348.1 | 445.2 | 579.9 | 748.6 | 935.3 | 1065.3 |  |
| 13.5   | 63                          | 310.4 | 350.2 | 429.1 | 539.4 | 680.2 | 840.4 | 955.0  | 324.6                         | 379.1 | 484.0 | 622.5 | 786.6 | 958.0 | 1072.2 |  |
| 14.5   | 53                          | 358.7 | 402.2 | 486.9 | 602.4 | 745.4 | 903.2 | 1013.4 | 341.0                         | 399.9 | 509.0 | 646.0 | 799.7 | 952.4 | 1050.3 |  |
| 15.5   | 49                          | 396.8 | 442.7 | 530.4 | 646.1 | 784.3 | 931.2 | 1030.6 | 347.0                         | 409.3 | 520.4 | 653.4 | 795.7 | 931.1 | 1015.4 |  |
| 16.5   | 63                          | 424.3 | 471.6 | 559.9 | 672.8 | 803.0 | 936.6 | 1024.5 | 346.5                         | 411.6 | 523.2 | 651.1 | 782.3 | 902.9 | 976.1  |  |
| 17.5   | 43                          | 445.7 | 493.6 | 581.1 | 689.9 | 811.4 | 932.3 | 1010.2 | 343.0                         | 410.6 | 522.3 | 644.8 | 766.1 | 874.2 | 938.6  |  |

Notes: The estimated percentiles are provided.

**Supplemental table 2 – Centile table of total IGFBP-3.**

|        |    | Total IGFBP-3 Male |        |        |        |        |        |        | Total IGFBP-3 Female |        |        |        |        |        |         |
|--------|----|--------------------|--------|--------|--------|--------|--------|--------|----------------------|--------|--------|--------|--------|--------|---------|
|        |    | (ng/mL)            |        |        |        |        |        |        | (ng/mL)              |        |        |        |        |        |         |
|        |    | Percentile         |        |        |        |        |        |        | Percentile           |        |        |        |        |        |         |
| Age, y | N  | P5                 | P10    | P25    | P50    | P75    | P90    | P95    | P5                   | P10    | P25    | P50    | P75    | P90    | P95     |
| 3.5    | 37 | 1917.2             | 2522.7 | 3579.8 | 4799.0 | 6052.6 | 7204.5 | 7903.2 | 3598.5               | 3985.9 | 4676.5 | 5507.1 | 6404.0 | 7267.9 | 7810.5  |
| 4.5    | 56 | 2211.3             | 2774.2 | 3759.3 | 4906.7 | 6100.3 | 7208.5 | 7885.7 | 3481.5               | 3922.4 | 4709.9 | 5658.0 | 6681.4 | 7665.5 | 8282.6  |
| 5.5    | 48 | 2491.8             | 3012.1 | 3929.2 | 5009.8 | 6147.2 | 7214.7 | 7871.9 | 3404.7               | 3894.9 | 4776.6 | 5845.5 | 7005.9 | 8126.6 | 8831.3  |
| 6.5    | 42 | 2732.0             | 3216.8 | 4078.8 | 5106.9 | 6202.9 | 7243.4 | 7889.3 | 3423.0               | 3937.8 | 4875.0 | 6028.6 | 7299.6 | 8543.1 | 9332.2  |
| 7.5    | 58 | 2922.7             | 3381.6 | 4204.3 | 5196.7 | 6267.7 | 7295.9 | 7939.6 | 3495.5               | 4014.2 | 4968.4 | 6159.0 | 7489.2 | 8807.7 | 9652.5  |
| 8.5    | 59 | 3076.4             | 3515.8 | 4309.4 | 5277.2 | 6334.0 | 7360.2 | 8007.8 | 3578.6               | 4096.6 | 5055.0 | 6260.9 | 7620.5 | 8980.0 | 9856.8  |
| 9.5    | 64 | 3193.2             | 3619.9 | 4395.5 | 5349.6 | 6401.8 | 7433.3 | 8089.1 | 3706.1               | 4221.2 | 5177.1 | 6385.0 | 7754.3 | 9131.1 | 10022.9 |
| 10.5   | 66 | 3256.0             | 3678.1 | 4447.4 | 5397.5 | 6450.2 | 7486.8 | 8148.2 | 3841.0               | 4354.7 | 5309.3 | 6519.1 | 7895.5 | 9285.1 | 10188.1 |
| 11.5   | 63 | 3263.3             | 3684.8 | 4451.2 | 5395.3 | 6438.3 | 7462.7 | 8115.1 | 3905.7               | 4418.6 | 5373.8 | 6588.1 | 7974.8 | 9380.1 | 10296.1 |
| 12.5   | 74 | 3215.4             | 3636.5 | 4399.0 | 5332.9 | 6358.4 | 7359.8 | 7994.8 | 3888.4               | 4394.9 | 5338.2 | 6537.9 | 7908.8 | 9299.0 | 10205.7 |
| 13.5   | 63 | 3133.0             | 3548.3 | 4298.6 | 5214.6 | 6217.1 | 7193.0 | 7810.4 | 3758.2               | 4255.1 | 5177.9 | 6346.7 | 7676.0 | 9017.6 | 9889.4  |
| 14.5   | 53 | 3023.8             | 3424.4 | 4150.3 | 5040.3 | 6018.2 | 6973.9 | 7580.1 | 3513.7               | 3997.1 | 4891.3 | 6016.8 | 7287.4 | 8560.3 | 9382.6  |
| 15.5   | 49 | 2869.1             | 3248.9 | 3941.7 | 4798.1 | 5747.5 | 6682.7 | 7279.5 | 3192.4               | 3653.3 | 4504.3 | 5572.1 | 6772.7 | 7970.2 | 8740.9  |
| 16.5   | 63 | 2695.8             | 3047.8 | 3694.1 | 4500.1 | 5402.2 | 6298.9 | 6874.9 | 2848.0               | 3275.3 | 4068.3 | 5068.9 | 6199.9 | 7332.9 | 8064.5  |
| 17.5   | 43 | 2520.9             | 2842.3 | 3435.5 | 4181.0 | 5022.2 | 5865.3 | 6410.4 | 2490.6               | 2883.5 | 3621.2 | 4566.1 | 5649.9 | 6750.0 | 7467.1  |

**Supplemental table 3 – Centile table of intact IGFBP-3.**

|        |    | Intact IGFBP-3 Male<br>(ng/mL) |        |        |        |        |        |        | Intact IGFBP-3 Female<br>(ng/mL) |        |        |        |        |        |        |
|--------|----|--------------------------------|--------|--------|--------|--------|--------|--------|----------------------------------|--------|--------|--------|--------|--------|--------|
|        |    | Percentile                     |        |        |        |        |        |        | Percentile                       |        |        |        |        |        |        |
| Age, y | N  | P5                             | P10    | P25    | P50    | P75    | P90    | P95    | P5                               | P10    | P25    | P50    | P75    | P90    | P95    |
| 3.5    | 37 | 322.2                          | 400.0  | 544.1  | 723.2  | 921.2  | 1114.7 | 1237.1 | 344.2                            | 445.7  | 624.2  | 832.2  | 1048.5 | 1249.0 | 1371.4 |
| 4.5    | 56 | 362.1                          | 457.1  | 625.2  | 823.5  | 1032.0 | 1227.3 | 1347.4 | 372.5                            | 486.8  | 683.4  | 906.5  | 1132.9 | 1338.7 | 1462.7 |
| 5.5    | 48 | 419.2                          | 528.4  | 714.6  | 925.1  | 1138.5 | 1332.4 | 1449.2 | 412.4                            | 536.4  | 746.6  | 981.3  | 1215.9 | 1426.8 | 1552.9 |
| 6.5    | 42 | 498.4                          | 616.2  | 812.5  | 1029.2 | 1244.4 | 1437.1 | 1551.9 | 467.1                            | 596.8  | 815.0  | 1057.2 | 1298.7 | 1515.2 | 1644.5 |
| 7.5    | 58 | 592.1                          | 714.4  | 916.1  | 1136.7 | 1354.1 | 1547.7 | 1662.6 | 540.7                            | 671.1  | 890.9  | 1136.4 | 1382.8 | 1605.0 | 1738.1 |
| 8.5    | 59 | 694.1                          | 817.7  | 1021.1 | 1243.3 | 1462.3 | 1657.1 | 1772.7 | 636.2                            | 762.8  | 978.9  | 1224.4 | 1474.7 | 1703.4 | 1841.7 |
| 9.5    | 64 | 789.1                          | 914.8  | 1121.1 | 1345.9 | 1566.9 | 1762.9 | 1879.2 | 745.5                            | 868.0  | 1080.5 | 1326.8 | 1582.7 | 1820.3 | 1965.6 |
| 10.5   | 66 | 874.6                          | 1004.0 | 1216.2 | 1447.1 | 1673.9 | 1875.0 | 1994.1 | 858.7                            | 979.5  | 1192.0 | 1442.3 | 1706.8 | 1956.1 | 2110.2 |
| 11.5   | 63 | 970.6                          | 1101.4 | 1317.8 | 1555.4 | 1790.6 | 2000.4 | 2125.3 | 965.0                            | 1087.2 | 1303.2 | 1559.5 | 1832.3 | 2091.3 | 2252.3 |
| 12.5   | 74 | 1071.8                         | 1203.5 | 1423.7 | 1668.9 | 1914.5 | 2135.7 | 2268.3 | 1060.4                           | 1185.2 | 1404.9 | 1664.7 | 1940.3 | 2201.4 | 2363.4 |
| 13.5   | 63 | 1154.9                         | 1289.6 | 1516.8 | 1772.0 | 2029.9 | 2263.9 | 2404.8 | 1146.1                           | 1272.4 | 1493.2 | 1752.0 | 2024.4 | 2280.7 | 2439.0 |
| 14.5   | 53 | 1226.4                         | 1363.3 | 1594.1 | 1853.3 | 2114.9 | 2352.3 | 2495.1 | 1220.6                           | 1347.3 | 1567.0 | 1822.3 | 2088.7 | 2337.5 | 2490.3 |
| 15.5   | 49 | 1280.8                         | 1419.9 | 1652.9 | 1912.6 | 2172.8 | 2407.6 | 2548.2 | 1278.4                           | 1405.7 | 1625.0 | 1878.0 | 2140.0 | 2383.1 | 2531.7 |
| 16.5   | 63 | 1314.7                         | 1455.8 | 1689.5 | 1946.6 | 2201.4 | 2429.0 | 2564.5 | 1319.8                           | 1449.1 | 1670.7 | 1924.0 | 2184.5 | 2424.4 | 2570.5 |
| 17.5   | 43 | 1341.6                         | 1481.2 | 1709.8 | 1958.0 | 2201.0 | 2415.9 | 2543.0 | 1352.7                           | 1485.6 | 1711.6 | 1967.9 | 2229.1 | 2468.2 | 2612.9 |

**Supplemental table 4 – Centile table of PAPP-A2.**

| Age, y | PAPP-A2 Male<br>(ng/mL) |       |       |       |       |       |       |       | PAPP-A2 Female<br>(ng/mL) |       |       |       |       |       |       |
|--------|-------------------------|-------|-------|-------|-------|-------|-------|-------|---------------------------|-------|-------|-------|-------|-------|-------|
|        | Percentile              |       |       |       |       |       |       |       | Percentile                |       |       |       |       |       |       |
|        | N                       | P5    | P10   | P25   | P50   | P75   | P90   | P95   | P5                        | P10   | P25   | P50   | P75   | P90   | P95   |
| 3.5    | 37                      | 0.164 | 0.197 | 0.259 | 0.345 | 0.458 | 0.604 | 0.724 | 0.172                     | 0.203 | 0.259 | 0.334 | 0.438 | 0.583 | 0.720 |
| 4.5    | 56                      | 0.147 | 0.178 | 0.236 | 0.316 | 0.425 | 0.564 | 0.681 | 0.159                     | 0.189 | 0.244 | 0.320 | 0.425 | 0.575 | 0.717 |
| 5.5    | 48                      | 0.132 | 0.160 | 0.214 | 0.289 | 0.390 | 0.521 | 0.629 | 0.148                     | 0.177 | 0.231 | 0.306 | 0.409 | 0.557 | 0.696 |
| 6.5    | 42                      | 0.121 | 0.148 | 0.198 | 0.267 | 0.358 | 0.474 | 0.570 | 0.138                     | 0.167 | 0.220 | 0.293 | 0.394 | 0.533 | 0.663 |
| 7.5    | 58                      | 0.114 | 0.139 | 0.186 | 0.250 | 0.332 | 0.434 | 0.516 | 0.130                     | 0.159 | 0.212 | 0.282 | 0.376 | 0.502 | 0.614 |
| 8.5    | 59                      | 0.108 | 0.133 | 0.178 | 0.237 | 0.311 | 0.398 | 0.466 | 0.126                     | 0.154 | 0.205 | 0.270 | 0.354 | 0.459 | 0.549 |
| 9.5    | 64                      | 0.105 | 0.129 | 0.173 | 0.227 | 0.292 | 0.366 | 0.421 | 0.121                     | 0.149 | 0.197 | 0.256 | 0.329 | 0.416 | 0.487 |
| 10.5   | 66                      | 0.101 | 0.126 | 0.169 | 0.220 | 0.279 | 0.344 | 0.391 | 0.113                     | 0.139 | 0.185 | 0.239 | 0.303 | 0.379 | 0.438 |
| 11.5   | 63                      | 0.094 | 0.119 | 0.163 | 0.214 | 0.270 | 0.331 | 0.374 | 0.099                     | 0.124 | 0.167 | 0.217 | 0.277 | 0.347 | 0.402 |
| 12.5   | 74                      | 0.083 | 0.109 | 0.154 | 0.206 | 0.264 | 0.325 | 0.367 | 0.084                     | 0.107 | 0.147 | 0.195 | 0.251 | 0.318 | 0.370 |
| 13.5   | 63                      | 0.072 | 0.099 | 0.145 | 0.199 | 0.260 | 0.325 | 0.371 | 0.073                     | 0.094 | 0.130 | 0.175 | 0.228 | 0.290 | 0.340 |
| 14.5   | 53                      | 0.065 | 0.090 | 0.135 | 0.189 | 0.252 | 0.320 | 0.369 | 0.066                     | 0.085 | 0.118 | 0.159 | 0.209 | 0.269 | 0.317 |
| 15.5   | 49                      | 0.060 | 0.080 | 0.119 | 0.168 | 0.229 | 0.297 | 0.348 | 0.061                     | 0.078 | 0.109 | 0.148 | 0.196 | 0.256 | 0.306 |
| 16.5   | 63                      | 0.051 | 0.066 | 0.096 | 0.138 | 0.193 | 0.261 | 0.315 | 0.059                     | 0.074 | 0.103 | 0.140 | 0.188 | 0.250 | 0.304 |
| 17.5   | 43                      | 0.039 | 0.049 | 0.071 | 0.104 | 0.152 | 0.221 | 0.283 | 0.058                     | 0.072 | 0.097 | 0.132 | 0.178 | 0.242 | 0.300 |

**Supplemental table 5 – Centile table of free IGF-I.**

| Age, y | Free IGF-I Male<br>(ng/mL) |      |      |      |      |      |       |       | Free IGF-I Female<br>(ng/mL) |      |      |      |      |      |       |
|--------|----------------------------|------|------|------|------|------|-------|-------|------------------------------|------|------|------|------|------|-------|
|        | Percentile                 |      |      |      |      |      |       |       | Percentile                   |      |      |      |      |      |       |
|        | N                          | P5   | P10  | P25  | P50  | P75  | P90   | P95   | P5                           | P10  | P25  | P50  | P75  | P90  | P95   |
| 3.5    | 37                         | 0.89 | 1.19 | 1.85 | 2.94 | 4.78 | 7.99  | 11.57 | 0.94                         | 1.27 | 1.9  | 2.77 | 3.92 | 5.46 | 6.80  |
| 4.5    | 56                         | 0.93 | 1.22 | 1.85 | 2.91 | 4.74 | 8.06  | 11.95 | 1.00                         | 1.35 | 2.02 | 2.94 | 4.22 | 5.96 | 7.52  |
| 5.5    | 48                         | 0.96 | 1.25 | 1.87 | 2.91 | 4.74 | 8.14  | 12.29 | 1.08                         | 1.44 | 2.14 | 3.14 | 4.54 | 6.51 | 8.33  |
| 6.5    | 42                         | 0.98 | 1.27 | 1.89 | 2.93 | 4.75 | 8.10  | 12.15 | 1.17                         | 1.54 | 2.29 | 3.35 | 4.88 | 7.09 | 9.17  |
| 7.5    | 58                         | 1.00 | 1.30 | 1.94 | 2.99 | 4.78 | 7.98  | 11.67 | 1.28                         | 1.67 | 2.46 | 3.59 | 5.24 | 7.66 | 9.98  |
| 8.5    | 59                         | 1.01 | 1.33 | 2.00 | 3.08 | 4.86 | 7.85  | 11.10 | 1.41                         | 1.83 | 2.65 | 3.86 | 5.61 | 8.23 | 10.77 |
| 9.5    | 64                         | 1.04 | 1.38 | 2.09 | 3.21 | 4.98 | 7.78  | 10.65 | 1.56                         | 2.00 | 2.87 | 4.14 | 6.01 | 8.81 | 11.57 |
| 10.5   | 66                         | 1.10 | 1.47 | 2.23 | 3.39 | 5.15 | 7.83  | 10.45 | 1.71                         | 2.18 | 3.1  | 4.42 | 6.39 | 9.35 | 12.30 |
| 11.5   | 63                         | 1.22 | 1.61 | 2.40 | 3.60 | 5.38 | 8.01  | 10.54 | 1.85                         | 2.33 | 3.28 | 4.65 | 6.68 | 9.75 | 12.80 |
| 12.5   | 74                         | 1.37 | 1.78 | 2.61 | 3.82 | 5.61 | 8.25  | 10.77 | 1.93                         | 2.43 | 3.39 | 4.77 | 6.79 | 9.82 | 12.82 |
| 13.5   | 63                         | 1.58 | 1.99 | 2.82 | 4.03 | 5.81 | 8.46  | 11.02 | 1.95                         | 2.44 | 3.38 | 4.72 | 6.66 | 9.50 | 12.27 |
| 14.5   | 53                         | 1.79 | 2.21 | 3.02 | 4.21 | 5.97 | 8.66  | 11.33 | 1.87                         | 2.35 | 3.26 | 4.54 | 6.34 | 8.94 | 11.39 |
| 15.5   | 49                         | 1.99 | 2.40 | 3.19 | 4.36 | 6.14 | 8.98  | 11.97 | 1.71                         | 2.17 | 3.04 | 4.24 | 5.91 | 8.24 | 10.39 |
| 16.5   | 63                         | 2.17 | 2.56 | 3.33 | 4.49 | 6.34 | 9.49  | 13.12 | 1.51                         | 1.94 | 2.76 | 3.88 | 5.40 | 7.46 | 9.31  |
| 17.5   | 43                         | 2.33 | 2.71 | 3.46 | 4.62 | 6.55 | 10.10 | 14.58 | 1.29                         | 1.7  | 2.47 | 3.49 | 4.85 | 6.64 | 8.20  |

**Supplemental table 6 – Centile table of percentage of free IGF-I to total IGF-I.**

| Age, y | Percentage of f/t IGF-I Male (%) |      |      |      |      |      |      |      | Percentage of f/t IGF-I Female (%) |      |      |      |      |      |      |  |
|--------|----------------------------------|------|------|------|------|------|------|------|------------------------------------|------|------|------|------|------|------|--|
|        | Percentile                       |      |      |      |      |      |      |      | Percentile                         |      |      |      |      |      |      |  |
|        | N                                | P5   | P10  | P25  | P50  | P75  | P90  | P95  | P5                                 | P10  | P25  | P50  | P75  | P90  | P95  |  |
| 3.5    | 37                               | 0.71 | 0.91 | 1.34 | 2.02 | 3.08 | 4.71 | 6.3  | 0.49                               | 0.7  | 1.09 | 1.63 | 2.34 | 3.29 | 4.09 |  |
| 4.5    | 56                               | 0.65 | 0.83 | 1.23 | 1.86 | 2.86 | 4.43 | 5.98 | 0.49                               | 0.67 | 1.02 | 1.52 | 2.22 | 3.2  | 4.1  |  |
| 5.5    | 48                               | 0.58 | 0.75 | 1.11 | 1.70 | 2.65 | 4.15 | 5.67 | 0.48                               | 0.64 | 0.95 | 1.41 | 2.1  | 3.11 | 4.09 |  |
| 6.5    | 42                               | 0.52 | 0.67 | 1.00 | 1.55 | 2.44 | 3.88 | 5.35 | 0.47                               | 0.61 | 0.89 | 1.31 | 1.96 | 2.97 | 3.99 |  |
| 7.5    | 58                               | 0.45 | 0.59 | 0.90 | 1.40 | 2.23 | 3.58 | 4.97 | 0.45                               | 0.58 | 0.83 | 1.22 | 1.82 | 2.76 | 3.74 |  |
| 8.5    | 59                               | 0.40 | 0.53 | 0.80 | 1.26 | 2.01 | 3.24 | 4.49 | 0.44                               | 0.55 | 0.78 | 1.13 | 1.67 | 2.53 | 3.42 |  |
| 9.5    | 64                               | 0.37 | 0.48 | 0.73 | 1.13 | 1.79 | 2.85 | 3.93 | 0.42                               | 0.52 | 0.74 | 1.05 | 1.54 | 2.31 | 3.12 |  |
| 10.5   | 66                               | 0.35 | 0.45 | 0.66 | 1.01 | 1.57 | 2.47 | 3.38 | 0.40                               | 0.49 | 0.69 | 0.97 | 1.42 | 2.12 | 2.85 |  |
| 11.5   | 63                               | 0.33 | 0.42 | 0.60 | 0.90 | 1.38 | 2.13 | 2.9  | 0.37                               | 0.46 | 0.64 | 0.89 | 1.29 | 1.93 | 2.6  |  |
| 12.5   | 74                               | 0.31 | 0.39 | 0.55 | 0.81 | 1.21 | 1.85 | 2.5  | 0.35                               | 0.43 | 0.59 | 0.82 | 1.17 | 1.73 | 2.33 |  |
| 13.5   | 63                               | 0.30 | 0.37 | 0.51 | 0.73 | 1.07 | 1.62 | 2.17 | 0.34                               | 0.41 | 0.54 | 0.74 | 1.05 | 1.53 | 2.03 |  |
| 14.5   | 53                               | 0.30 | 0.36 | 0.49 | 0.68 | 0.98 | 1.45 | 1.95 | 0.31                               | 0.38 | 0.5  | 0.68 | 0.95 | 1.36 | 1.78 |  |
| 15.5   | 49                               | 0.31 | 0.36 | 0.48 | 0.65 | 0.93 | 1.39 | 1.88 | 0.29                               | 0.35 | 0.47 | 0.63 | 0.88 | 1.25 | 1.61 |  |
| 16.5   | 63                               | 0.32 | 0.37 | 0.48 | 0.65 | 0.93 | 1.42 | 1.97 | 0.25                               | 0.31 | 0.43 | 0.59 | 0.82 | 1.16 | 1.47 |  |
| 17.5   | 43                               | 0.33 | 0.38 | 0.49 | 0.66 | 0.95 | 1.5  | 2.19 | 0.21                               | 0.27 | 0.39 | 0.55 | 0.77 | 1.07 | 1.34 |  |

**Abbreviations:** f/t IGF-I, free to total IGF-I.

**Supplemental table 7 – Comparison of mean values among breast Tanner stages.**

| Variable                                             | Stage 1              |         | Stage 2              |         | Stage 3            |         | Stage 4              |         | Stage 5              |         |
|------------------------------------------------------|----------------------|---------|----------------------|---------|--------------------|---------|----------------------|---------|----------------------|---------|
| <b>Total IGF-I<sup>†</sup></b>                       | 273.8 <sup>a</sup>   | (105.9) | 461.2 <sup>b</sup>   | (172.9) | 800.3 <sup>c</sup> | (193.0) | 742.7 <sup>c</sup>   | (206.8) | 626.6 <sup>d</sup>   | (212.8) |
| <b>Free IGF-I<sup>†</sup></b>                        | 3.83 <sup>a</sup>    | (2.67)  | 7.16 <sup>b</sup>    | (15.52) | 7.53 <sup>c</sup>  | (3.93)  | 4.82 <sup>b, d</sup> | (2.21)  | 4.49 <sup>a, d</sup> | (4.07)  |
| <b>Percentage of free to total IGF-I<sup>†</sup></b> | 1.55 <sup>a</sup>    | (1.27)  | 1.49 <sup>a</sup>    | (1.75)  | 0.99 <sup>b</sup>  | (0.60)  | 0.67 <sup>c</sup>    | (0.30)  | 0.72 <sup>c</sup>    | (0.51)  |
| <b>Total IGFBP-3</b>                                 | 6129 <sup>a, b</sup> | (1861)  | 6761 <sup>a, c</sup> | (1880)  | 7283 <sup>c</sup>  | (1881)  | 5698 <sup>b, d</sup> | (1826)  | 5130 <sup>d</sup>    | (1644)  |
| <b>Intact IGFBP-3</b>                                | 1088 <sup>a</sup>    | (352.7) | 1397 <sup>b</sup>    | (385.3) | 1770 <sup>c</sup>  | (391.7) | 1925 <sup>d</sup>    | (346.1) | 1940 <sup>d</sup>    | (403.9) |
| <b>PAPPA2<sup>†</sup></b>                            | 0.33 <sup>a</sup>    | (0.21)  | 0.28 <sup>b</sup>    | (0.15)  | 0.20 <sup>c</sup>  | (0.09)  | 0.16 <sup>d</sup>    | (0.07)  | 0.15 <sup>d</sup>    | (0.08)  |

<sup>†</sup> The natural log-transformation was used for statistical analysis. Mean (SD) was shown. Within each analyte, values with the same letter are not significantly different ( $P > 0.05$ ) while those with different letters are significantly different ( $P < 0.05$ ).

Supplemental Figure

Supplemental Figure S1. Inhibition of Free IGF-I measurement by IGFBPs.

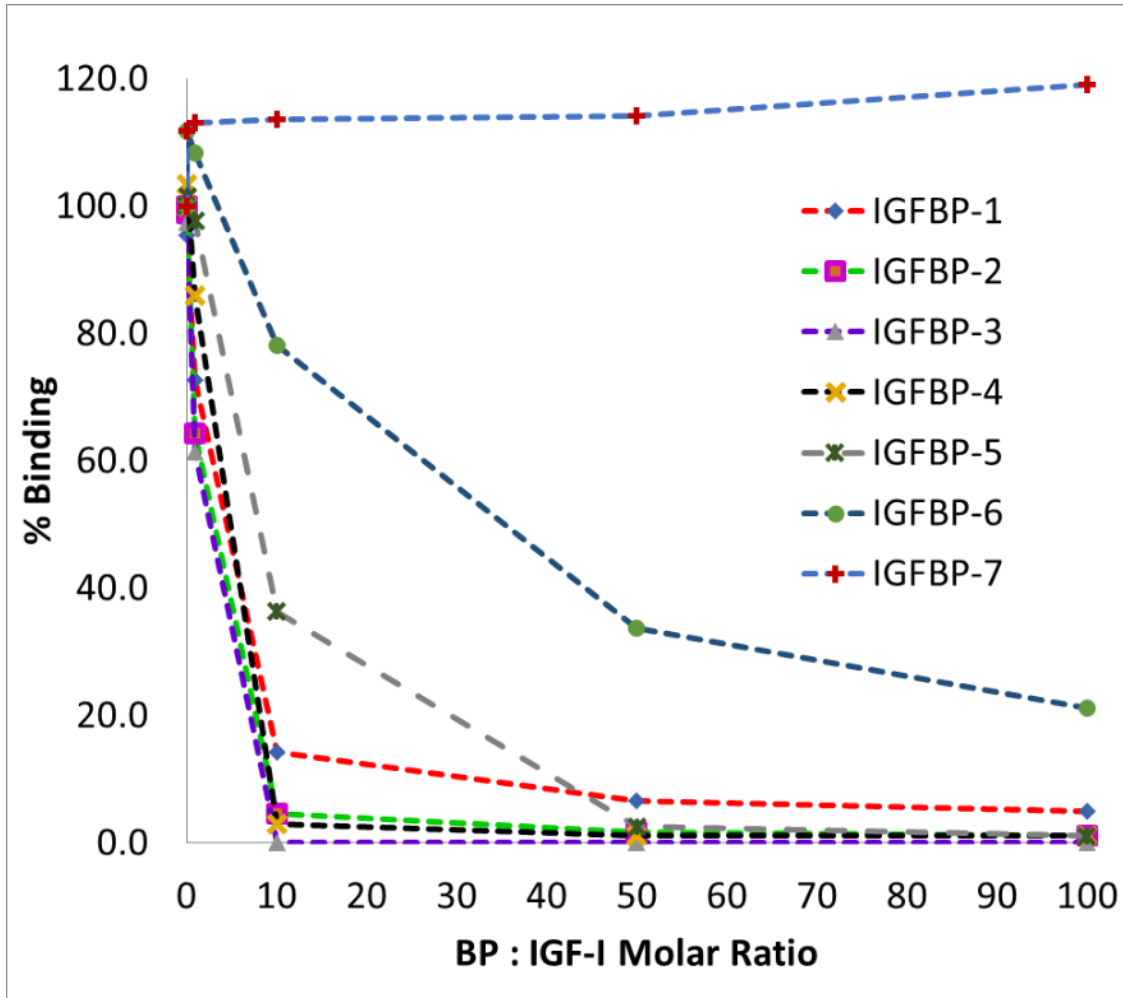

Supplemental Figure S1. Inhibition of Free IGF-I measurement by IGFBPs.

Various molar ratios of IGF-I and IGFBPs were tested. All specimens contained 5 ng/mL of added rhIGF-I and were tested in the total and free IGF-I ELISAs. Inhibition of free IGF-I quantitation, which should be complete if there is no interference or release of bound IGF-I, is expressed as the percent of free IGF-I and was calculated after normalizing the unbound IGF-I measurement for each preparation with respect to the IGF-I in the absence of binding proteins.



**Supplemental Figure S2. Epitope mapping of Total and Intact IGFBP-3 ELISAs.**

| N- Terminal | Mid Region | C-Terminal | Detection in Intact IGFBP3 ELISA | Detection in Total IGFBP3 ELISA |
|-------------|------------|------------|----------------------------------|---------------------------------|
| IGFBP5      | IGFBP3     | IGFBP3     | +++                              | +++                             |
| IGFBP5      | IGFBP5     | IGFBP3     | Not Detected                     | +++                             |
| IGFBP3      | IGFBP5     | IGFBP5     | Not Detected                     | Not Detected                    |
| IGFBP3      | IGFBP3     | IGFBP5     | Not Detected                     | Not Detected                    |
| IGFBP5      | IGFBP3     | IGFBP5     | Not Detected                     | Not Detected                    |
| IGFBP3      | IGFBP5     | IGFBP3     | Not Detected                     | +++                             |

**Supplemental Figure S2. Epitope mapping of Total and Intact IGFBP-3 ELISAs.**

Recombinant IGFBP proteins (“chimeras”) were designed to generate 6 difference combinations of the N, Mid, or C regions of IGFBP3 and IGFBP5, as previously reported (47). Both monoclonal antibodies used in the Total IGFBP3 ELISA recognize the C-terminal of IGFBP3. The monoclonal antibodies in the Intact IGFBP3 ELISA recognize both the Mid-region and C-terminal, respectively.

1. Gaidamauskas E, Gyrupe C, Boldt HB, Schack VR, Overgaard MT, Laursen LS, Oxvig C. IGF dependent modulation of IGF binding protein (IGFBP) proteolysis by pregnancy-associated plasma protein-A (PAPP-A): Multiple PAPP-A-IGFBP interaction sites. *Biochimica et Biophysica Acta (BBA) - General Subjects*. 2013;1830(3):2701-2709.
